# Supplementary material for: Antimicrobial activity of a quaternary ammonium methacryloxy silicate-containing acrylic resin: a randomised clinical trial
Source: PubMed Central journal article supplement (PMC4763235; doi:10.1038/srep21882), 2016-02-23
Supplement: srep21882-s1.pdf [file srep21882-s1.pdf]

## **Antimicrobial activity of a quaternary ammonium methacryloxy silicate-containing acrylic resin: a randomised clinical trial**

Si-ying Liu<sup>1</sup>, Lige Tonggu<sup>2</sup>, Li-na Niu<sup>3\*</sup>, Shi-qiang Gong<sup>4</sup>, Bin Fan<sup>1</sup>, Ligu Wang<sup>2</sup>, Ji-hong Zhao<sup>1</sup>, Cui Huang<sup>1\*</sup>, David H. Pashley<sup>5</sup>, Franklin R. Tay<sup>5\*</sup>

### **Supplementary Information**

1. Supplementary Figure S1
2. Supplementary Video S1: 3-D reconstruction of a plaque biofilm with > 25% kill, taken from the experimental side (QAMS-containing acrylic disk) of subject 3. A higher resolution of the video is available at <https://www.youtube.com/watch?v=81A-LvK5teo&feature=youtu.be>.
3. Supplementary Video S2: 3-D reconstruction of a plaque biofilm taken from the corresponding control side (QAMS-free acrylic disk) of subject 3. A higher resolution of the video is available at <https://youtu.be/GctX11PfQ6E>.
4. Supplementary Video S3: 3-D reconstruction of a plaque biofilm with < 25% kill, taken from the experimental side (QAMS-containing acrylic disk) of subject 25. A higher resolution of the video is available at <http://youtu.be/YvbdYeX6RoM>.
5. Supplementary Video S4: 3-D reconstruction of a plaque biofilm taken from the corresponding control side (QAMS-free acrylic disk) of subject 25. A higher resolution of the video is available at <http://youtu.be/RbLNT0m7AHc>.

## Supplementary Figure S1

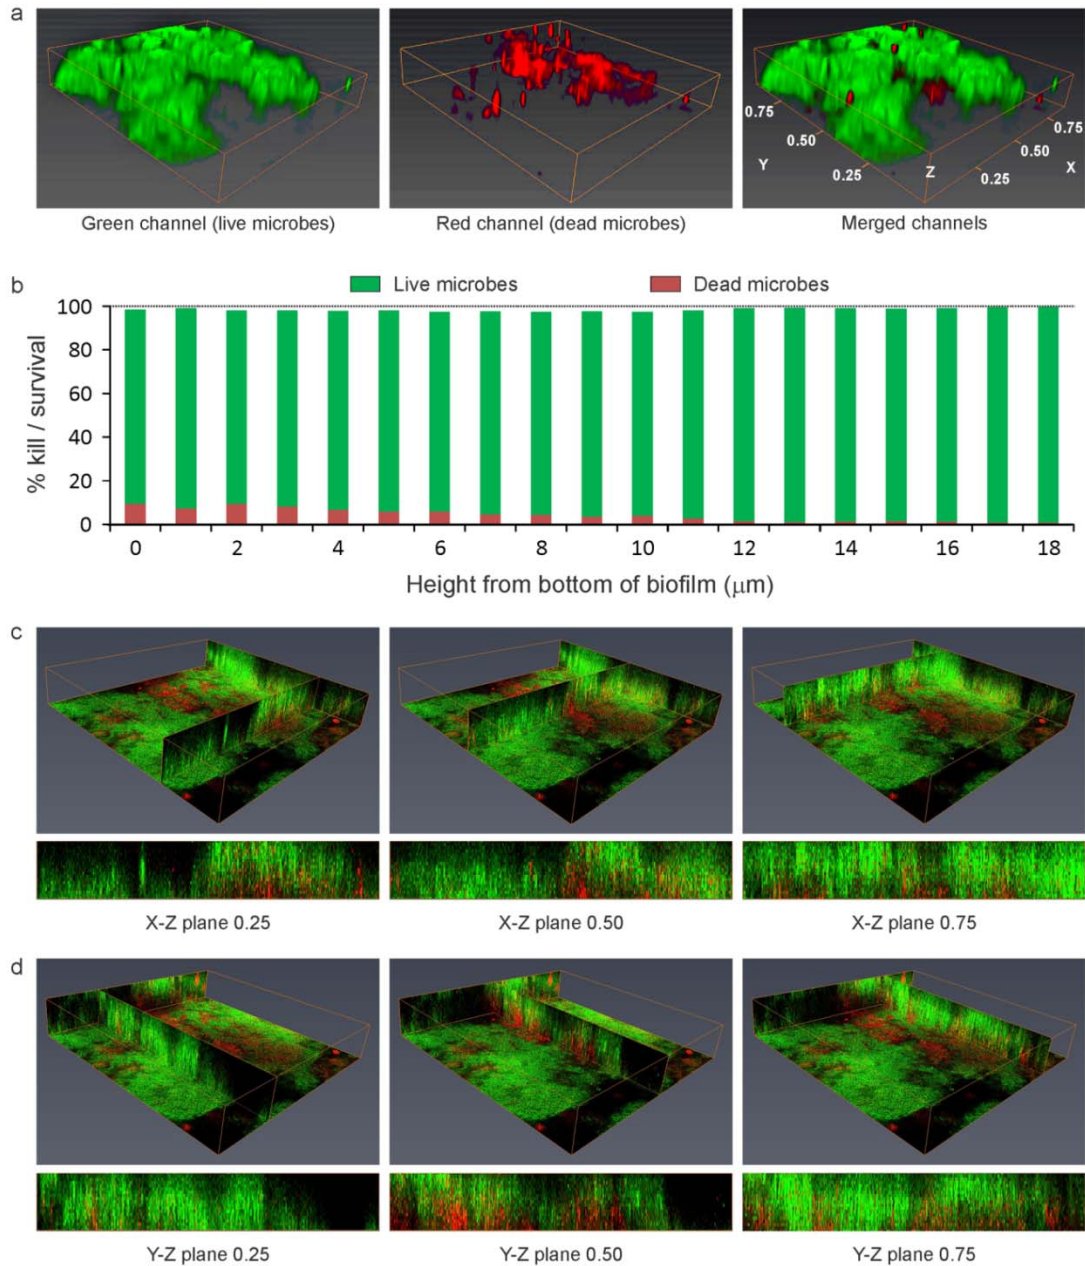

The corresponding BacLight-stained 48-hour biofilm grown on the surface of QAMS-free acrylic resin (control disk) of the subject presented in Figure 5 (Subject-25). **a.** 3-D projection for the green, red and merged channels of the biofilm (Z-axis scaled-in to the same extent as Fig.3). Green channel: live microorganisms; red channel: dead microorganisms. **b.** Live/dead microorganism distribution from the bottom to the top of the biofilm, indicating the percentage of kill in different layers of the biofilms. **c.** Perspectives of the biofilm viewed from the X-Z plane at 0.25, 0.50 and 0.75 width of the Y-axis. **d.** Perspectives of the biofilm viewed from the Y-Z plane at 0.25, 0.50 and 0.75 width of the X-axis.
